# Supplementary material for: Validation and Comparison of Climate Reanalysis Data in the East Asian Monsoon Region
Source: MDPI journal article supplement (doi:10.3390/atmos13101589), 2022-09-28
Supplement: s1 [file s1]

Archive with 1 entries (1 files):
- atmosphere-1877980-supplementary.pdf
